# Supplementary material
Source: PubMed Central journal article supplement (PMC3198331)
Supplement: 1107857108_pnas.201107857SI.pdf [file 1107857108_pnas.201107857SI.pdf]

# Supporting Information

Thiennimitr et al. 10.1073/pnas.1107857108

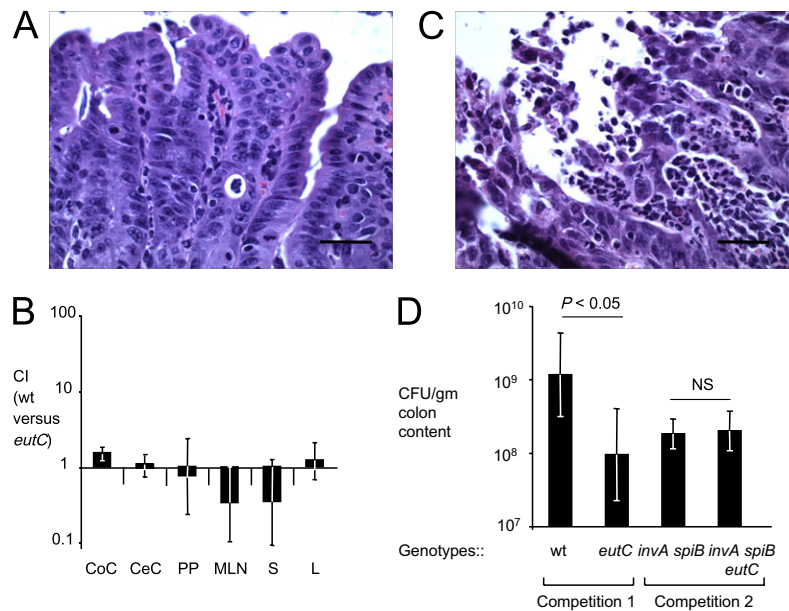

**Fig. S1.** Contribution of ethanolamine utilization to colonization in the typhoid mouse model versus the mouse colitis model. (A) Representative image (80 $\times$ ) of H&E-stained cecal sections from the mouse typhoid model. Note the predominant monocytic infiltrate. (Scale bar, 50  $\mu$ m.) (B) Mice (mouse typhoid model) were orally inoculated with an equal mixture of the *Salmonella enterica* serovar Typhimurium (*S. Typhimurium*) wild-type (wt) *eutC* mutant (PT100). Four days after infection, bacteria were recovered from the tissues, as indicated, and the competitive index (CI) calculated. CoC, colon content; CeC cecal content; PP, Peyer's patches; MNL, mesenteric lymph node; S, spleen; L, liver. (C) Representative image (80 $\times$ ) of H&E-stained cecal sections from the mouse colitis model. Note the exudative inflammation and concomitant neutrophilic infiltration. (Scale bar, 50  $\mu$ m.) (D) Mice (mouse colitis model) were orally inoculated with an equal mixture of the *S. Typhimurium* wild-type (wt) and the *eutC* mutant (PT100) (competition 1) or an *invA spiB* mutant and a *invA spiB eutC* mutant (competition 2). Data represent the geometric mean from four animals  $\pm$  SE.



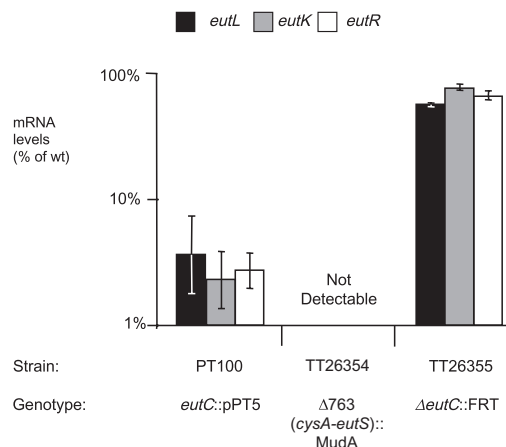

**Fig. S4.** Polarity of *eutC*::pPT5 and  $\Delta eutC$ ::FRT mutations on expression of downstream genes. Expression levels of the *eutLKR* genes, which are located downstream of the *eutC* gene, were determined by quantitative real-time PCR with primers listed in Table S2. Each experiment was repeated three times independently. Data represent geometric mean  $\pm$  SE of mRNA levels detected for *eutL* (black bars), *eutK* (gray bars), and *eutR* (open bars) relative to mRNA levels detected for these genes in the *S. Typhimurium* wild-type strain (IR715), which were set to 100%. A strain lacking the entire *eut* operon (TT26354) was used as a negative control.

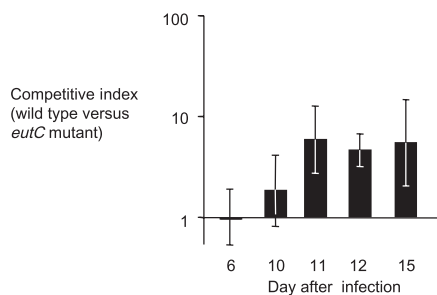

**Fig. S5.** Ethanolamine utilization genes confer a growth advantage in streptomycin-pretreated genetically resistant (129/svJ) mice. Competitive indices of *S. Typhimurium* strains recovered from the fecal pellets (days 6–12) and colon contents (day 15). Data represent the geometric mean  $\pm$  SE.

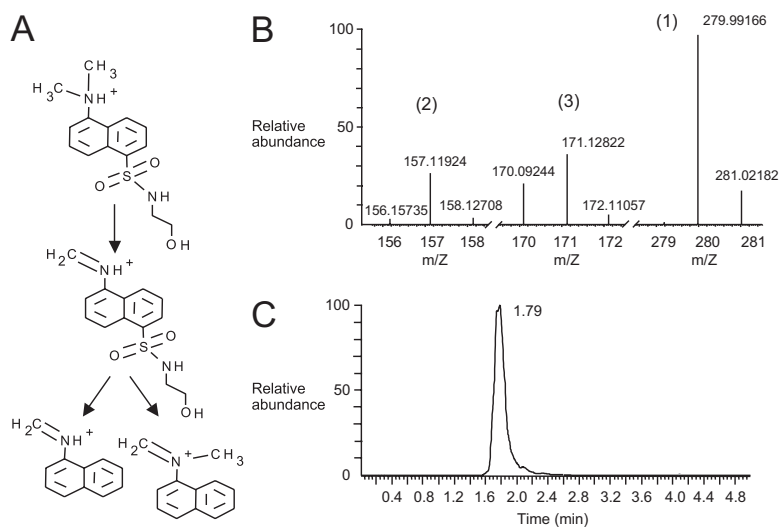

**Fig. S6.** Quantification of ethanolamine in colonic extracts by LC-MS/MS. (A) Structural formula of fragments of derivatized ethanolamine ([*N*-dansyl]ethanolamine). (B) Representative single-ion monitoring scan spectra of the parent ions depicted in A. (C) Representative elution profile of transition 295/280; [*N*-dansyl]ethanolamine breakdown product.

**Table S1. Bacterial strains and plasmids used in this study**

| Designation                   | Genotype and relevant characteristics                   | Reference     |
|-------------------------------|---------------------------------------------------------|---------------|
| <i>S. typhimurium</i> strains |                                                         |               |
| IR715                         | Nalidixic acid-resistant derivative of ATCC 14028       | (1)           |
| SPN452                        | IR715 $\Delta invA::tetRA \Delta spiB::KSAC$            | (2)           |
| SW661                         | IR715 $ttrA::pSW171$                                    | (3)           |
| PT100                         | IR715 $eutC::pPT5$                                      | Present study |
| AJB715                        | IR715 $phoN::KSAC$                                      | (4)           |
| PT102                         | IR715 $\Delta invA::tetRA \Delta spiB::KSAC eutC::pPT5$ | Present study |
| PT106                         | IR715 $ttrA::pSW171 eutC::pPT5$                         | Present study |
| TT26354                       | IR715 $\Delta 763(cysA-eutS)::MudA$                     | (5)           |
| PT238                         | PT100 $eutC$ restored                                   | Present study |
| TT26355                       | IR715 $\Delta eutC::FRT$                                | (6)           |
| TT26356                       | IR715 $hisG::Tn10d-Tet eutC::pPT5$ (F' 606)             | Present study |
| PT251                         | IR715 $hisG::Tn10d-Tet phoN::KSAC eutC::pPT5$ (F' 606)  | Present study |
| TT26358                       | IR715 $hisG::Tn10d-Tet eutC::pPT5$ (F' pPT5)            | Present study |
| Plasmids                      |                                                         |               |
| pCR2.1                        | Cloning vector                                          | Invitrogen    |
| pEP185.2                      | $ori(R6K) mobRP4 cat$                                   | (7)           |
| pPT3                          | ' $eutC$ ' cloned into pCR2.1                           | Present study |
| pPT5                          | ' $eutC$ ' cloned into pEP185.2                         | Present study |
| F' 606                        | F plasmid carrying $his$ locus and $eut$ locus          | (8)           |
| F' pPT5                       | F' 606 $eutC::pPT5$                                     | Present study |

- Stojiljkovic I, Bäumlér AJ, Heffron F (1995) Ethanolamine utilization in *Salmonella typhimurium*: Nucleotide sequence, protein expression, and mutational analysis of the *cchA cchB eutE eutJ eutG eutH* gene cluster. *J Bacteriol* 177:1357–1366.
- Raffatellu M, et al. (2009) Lipocalin-2 resistance confers an advantage to *Salmonella enterica* serotype typhimurium for growth and survival in the inflamed intestine. *Cell Host Microbe* 5:476–486.
- Winter SE, et al. (2010) Gut inflammation provides a respiratory electron acceptor for *Salmonella*. *Nature* 467:426–429.
- Kingsley RA, et al. (2003) Molecular and phenotypic analysis of the CS54 island of *Salmonella enterica* serotype typhimurium: Identification of intestinal colonization and persistence determinants. *Infect Immun* 71:629–640.
- Kofoid E, Rappleye C, Stojiljkovic I, Roth J (1999) The 17-gene ethanolamine (*eut*) operon of *Salmonella typhimurium* encodes five homologues of carboxysome shell proteins. *J Bacteriol* 181:5317–5329.
- Penrod JT, Roth JR (2006) Conserving a volatile metabolite: A role for carboxysome-like organelles in *Salmonella enterica*. *J Bacteriol* 188:2865–2874.
- Kinder SA, Badger JL, Bryant GO, Pepe JC, Miller VL (1993) Cloning of the *YenI* restriction endonuclease and methyltransferase from *Yersinia enterocolitica* serotype O8 and construction of a transformable R-M+ mutant. *Gene* 136:271–275.
- Roof DM, Roth JR (1992) Autogenous regulation of ethanolamine utilization by a transcriptional activator of the *eut* operon in *Salmonella typhimurium*. *J Bacteriol* 174:6634–6643.

**Table S2. Primers used in this study**

| Organism              | Target gene/purpose                                  | Sequence                                                              |
|-----------------------|------------------------------------------------------|-----------------------------------------------------------------------|
| <i>Mus musculus</i>   | <i>Gapdh</i> /qRT-PCR                                | 5'-TG TAG ACC AT GT AG TT G AG GT CA-3'<br>5'-AGGTCGGTGTGAACGGATTG-3' |
| <i>M. musculus</i>    | <i>Kc</i> /qRT-PCR                                   | 5'-TGCACCCAAACCGAAGTCAT-3'<br>5'-TTGTCAGAAGCCAGCGTTCAC-3'             |
| <i>M. musculus</i>    | <i>Nos2</i> /qRT-PCR                                 | 5'-TTGGGTCTTGTCTCACTCCACGG-3'<br>5'-CCTCTTTCAGGTCATTTGGTAGG-3'        |
| <i>S. Typhimurium</i> | <i>gmk</i> /qRT-PCR                                  | 5'-TTGGCAGGGAGGCGTTT-3'<br>5'-GCGCGAAGTGCCGTAGTAAT-3'                 |
| <i>S. Typhimurium</i> | <i>eutL</i> /qRT-PCR                                 | 5'-GCGACAAAACAGGCGATGG-3'<br>5'-ACACCTCACCAGCGGTAGG-3'                |
| <i>S. Typhimurium</i> | <i>eutK</i> /qRT-PCR                                 | 5'-GAAGTGGACGGAATGGTCG-3'<br>5'-GATGACTGAGCAAACGCACG-3'               |
| <i>S. Typhimurium</i> | <i>eutR</i> /qRT-PCR                                 | 5'-TGGACAATGTTTCATCAGCGAC-3'<br>5'-CATCAAGCAGGATTTCCGTG-3'            |
| <i>S. Typhimurium</i> | <i>eutC</i> /insertional inactivation of <i>eutC</i> | 5'-GAGCTTGTACGTAGCGTGATG-3'<br>5'-GGTACCGCACTGTGACTTCAG-3'            |
